# Supplementary material
Source: Springer Nature journal article supplement (https://www.springermedizin.de/resource/supplementary/12889_2005_454_MOESM2_ESM.pdf/9500904)

Hypothetical Open Cohort

beginning with 1000 persons  
entering the US with B-notification

Entry to US      Time →      End (20 yrs)

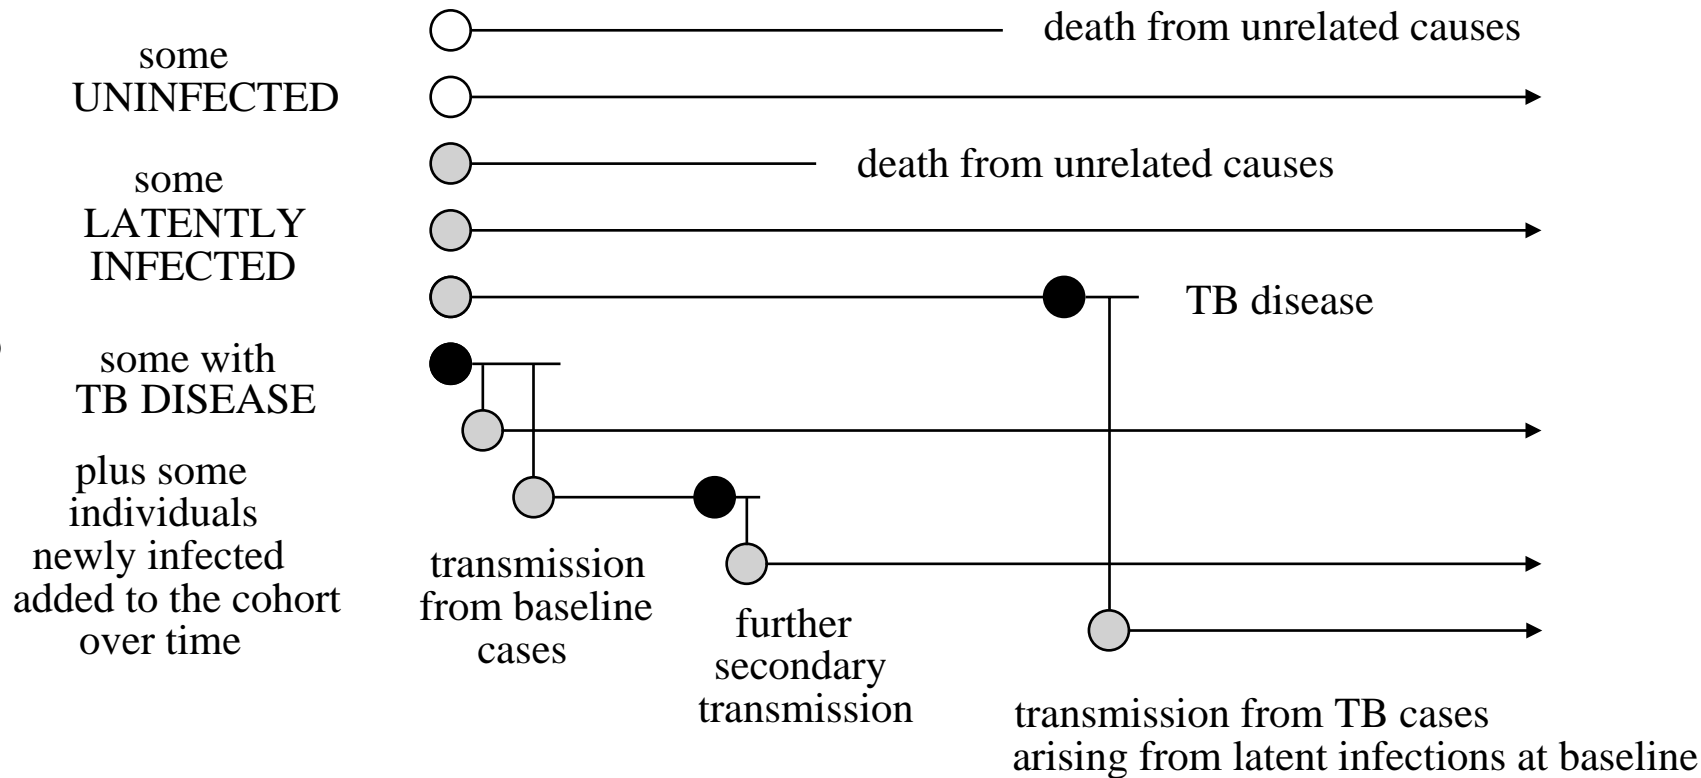

Supplement: MOESM2 [file 9500904]
